# Supplementary material for: Preparation, characterization and electrocatalysis performance of a trimeric ruthenium-substituted isopolytungstate
Source: Royal Society of Chemistry journal article supplement (doi:10.1039/c9dt01615e), 2019-01-01
Supplement: c9dt01615e1.pdf [file c9dt01615e1.pdf]

Electronic Supporting Information

## Preparation, characterization and electrocatalysis performance of a trimeric ruthenium-substituted isopolytungstate

Rong Wan, Huafeng Li, Xinyi Ma, Zhen Liu, Vikram Singh, Pengtao Ma, Chao Zhang, Jingyang Niu\* and Jingping Wang\*

Henan Key Laboratory of Polyoxometalate Chemistry, College of Chemistry and Chemical Engineering, Henan University, Kaifeng, Henan 475004, (P. R. China), Fax: (+86)-371-23886876, E-mail: jyniu@henu.edu.cn, jpwang@henu.edu.cn

### Contents

**Table S1** A summary of pure inorganic ruthenium-containing POMs with well-defined structures  
**Fig. S1** (a) The actual polyoxoanion structure of **1** on the crystallography; (b) The simplified schematic of **1a**.

**Fig. S2** Representation of the polyanion **1a** assembled from three building blocks  $\{\text{Ru}_{0.83}\text{W}_{10.17}\}$  in idealized  $C_{3v}$  symmetry.

**Fig. S3** Structures of polyanion **1a** (a) and  $\{\text{H}_3\text{Ru}_{1.83}\text{W}_{10.17}\text{O}_{40}\}$  cluster (b) with BVS assignments; (c) Keggin-like iso-POT  $\alpha\text{-}\{\text{H}_2\text{W}_{12}\text{O}_{40}\}$  (metatungstate); (d) classical Keggin-type hetero-POT  $[\text{XW}_{12}\text{O}_{40}]^{n-}$  (X = Si, P, Ge, As, et. al.).

**Table S2** The BVS calculations of all O atoms on **1a**.

**Table S3** The BVS calculations of all W and Se atoms on **1a**.

**Fig. S4** The crystal packing arrangements of polyanions **1a** packing along the c axes and the simplified packing of **1a** viewed along the ab plane.

**Fig. S5** (a) ball-and-stick representation of polyanion  $\{(\text{H}_2\text{O})_4\text{K}[\text{H}_{12}\text{W}_{36}\text{O}_{120}]\}^{11-}$  ( $\{\text{W}_{36}\}$ ); (b) the divacant  $\{\text{W}_{11}\}$  building block in  $\{\text{W}_{36}\}$  cluster; (c) the monovacant Keggin-like  $\{\text{Ru}_{0.83}\text{W}_{10.17}\}$  building block in polyanion **1a**; (d) a chain-linked iso-POT  $\{(\text{DMAH})_6[\text{H}_4\text{CoW}_{11}\text{O}_{39}]\cdot 6\text{H}_2\text{O}\}_n$  based on monovacant Keggin-like  $\{\text{W}_{11}\}$  subunit.

**Fig. S6** XPS spectra for (a) W 4f, (b) Se 3d, and (c) Ru 3d. Spectra analysis was carried out using peak fitting with Gaussian–Lorentzian peak shape and Shirley type background subtraction, and the C 1s peak typically locates at 284.6 eV taking as a reference. (d) Low-temperature EPR spectra of compound **1**.

**Fig. S7** (a) ESI-MS spectrum of compound **1** in the selected range  $m/z = 1325\text{--}1500$ ; (b) Selected experimental (black) and simulated (red) mass spectra of the isotopic envelopes for at  $m/z = 1404.74$  ( $-6$ ).

**Table S4** Detailed assignment of mass spectral data in the selected range  $m/z = 1325\text{--}1500$ .

**Fig. S8** Negative ESI-MS spectra of compound **1** in aqueous solution over 24 h.

**Fig. S9** Negative ESI-MS spectrum of compound **1** at different pH values in the selected range  $m/z = 1325\text{--}1500$ .

**Fig. S10** UV/Vis spectra of **1** in dilute solution at different pH values: (a) pH = 6.3–11.0; (b) pH = 2.5–6.3.

**Fig. S11** IR spectra of compound **1** (black line) and before and precipitation obtained by addition of excess RbCl solids into 0.5 M NaCl solution (containing 1 mM **1**) after continuous cycling test 50 cycles (blue line).

**Fig. S12** Negative ESI-MS spectra of the precipitate which obtained from treating electrolyte solution (containing the compound **1**).

**Table S5** Electrocatalytic performance of nitrite oxidation for various catalysts or modified electrodes.

**Fig. S13** TG curve of compound **1**.

**Fig. S14** SEM image and EDX spectrum of single crystal of **1**.

**Table S1.** A summary of pure inorganic ruthenium-containing POMs with well-defined structures.

| Compounds                                                                   | Year | Ref.      |
|-----------------------------------------------------------------------------|------|-----------|
| $\{O[Ru^{IV}(X)P_2W_{17}O_{61}]_2\}^{16-}$ (X = OH, Cl)                     | 1993 | 1         |
| $[\{\alpha-SiW_{11}O_{39}Ru^{III}\}_2O]^{12-}$                              | 2007 | 2         |
| $[\{PW_{11}O_{39}\}_2\{(HO)Ru^{IV}-O-Ru^{IV}(OH)\}]^{10-}$                  | 2008 | 3         |
| $[\{Ru^{IV}_4O_4(OH)_2(H_2O)_4\}(\gamma-SiW_{10}O_{36})_2]^{10-}$           | 2008 | 4         |
| $[Ru^{IV}_4Cl_4O_2(\mu-OH)_4(\gamma-SiW_{10}O_{36})_2]^{12-}$               | 2008 | 5         |
| $[\gamma-XW_{10}O_{38}\{Ru^{IV}N\}_2]^{6-}$ (X = Si, Ge)                    | 2009 | 6         |
| $[(\gamma-PW_{10}O_{36})_2Ru^{IV}_4O_5(OH)(H_2O)_4]^{9-}$                   | 2010 | 7         |
| $[\{Ru^{IV}_4O_6(H_2O)_9\}_2Sb_2W_{20}O_{68}(OH)_2]^{4-}$                   | 2012 | 8         |
| $[\{Ru^{IV}_4O_6(H_2O)_9\}_2\{Fe(H_2O)_2\}_2\{\beta-TeW_9O_{33}\}_2H]^{4-}$ | 2012 | 8         |
| $[H_2Mo^{VI}_{14}Ru^{IV}_2O_{50}(OH)_2]^{10-}$                              | 2018 | 9         |
| $[SeO_3(H_3Ru^{IV}W_{11}O_{38})_3]^{14-}$                                   | 2019 | This work |

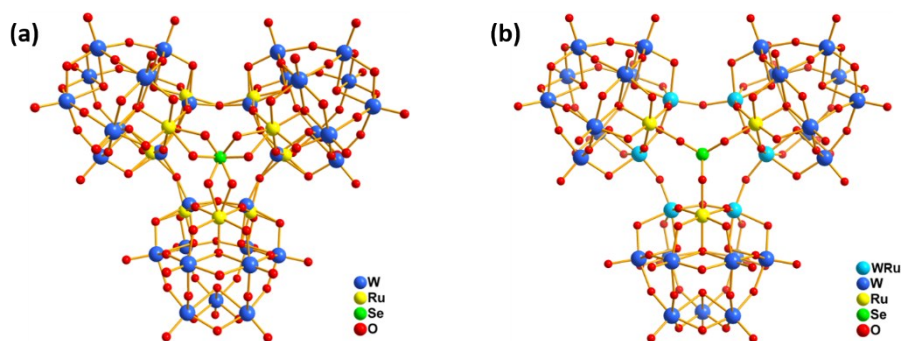

**Fig. S1** (a) The actual polyoxoanion structure of **1** on the crystallography. (b) The simplified schematic of **1a**. O atoms around Se atom are disordered due to the symmetry, thus, we present **1a** with Fig. S1b briefly, so that we can be easily understand.

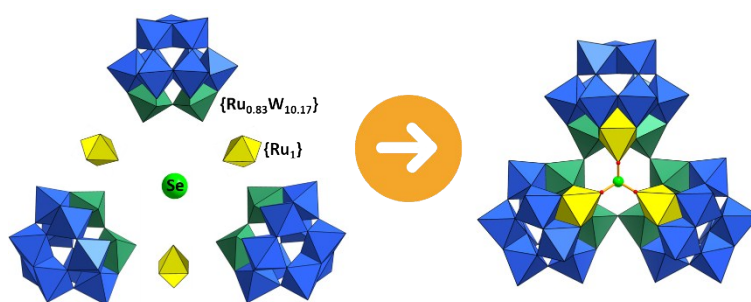

**Fig. S2** Representation of the polyanion **1a** assembled from three building blocks  $\{\text{RuW}_{11}\}$  in idealized  $C_{3v}$  symmetry. Colour code:  $\text{WO}_6$  octahedra, blue;  $\text{W/RuO}_6$  octahedra, sea green;  $\text{RuO}_6$  octahedra, yellow; O, red balls; Se, green ball.

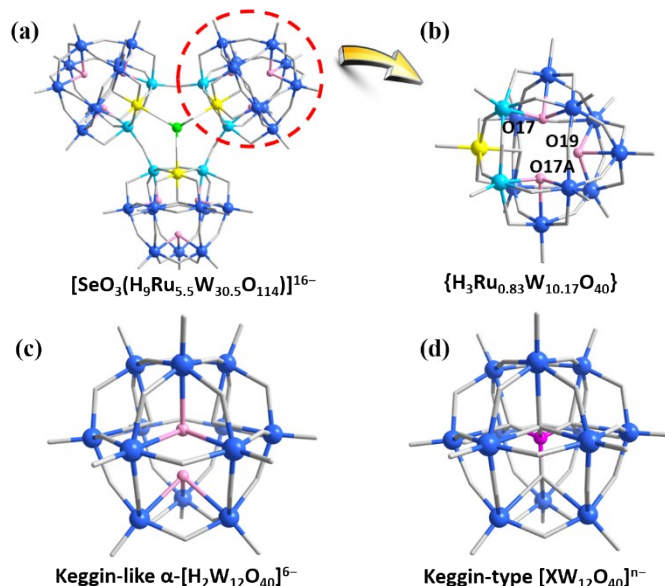

**Fig. S3** Structures of polyanion **1a** (a) and  $\{\text{H}_3\text{Ru}_{0.83}\text{W}_{10.17}\text{O}_{40}\}$  cluster (b) with BVS assignments; (c) Keggin-like iso-POT  $\alpha\text{-}[\text{H}_2\text{W}_{12}\text{O}_{40}]$  (metatungstate); (d) classical Keggin-type hetero-POT  $[\text{XW}_{12}\text{O}_{40}]^{n-}$  ( $\text{X} = \text{Si}, \text{P}, \text{Ge}, \text{As}, \text{et. al.}$ ) ( $\text{W}$ , blue balls;  $\text{Se}$ , green balls;  $\text{Ru}$ , yellow balls; monoprotonated O, pink balls;  $\text{O}^{2-}$  ligand, grey sticks, scheme outlined in Table S2).

**Table S2.** The BVS calculations of all crystallographically unique O atoms on **1a**.

| Atom | BVS  | Atom | BVS  |
|------|------|------|------|
| O1   | 2.09 | O13  | 1.96 |
| O2   | 2.04 | O14  | 1.96 |
| O3   | 1.89 | O15  | 2.07 |
| O4   | 1.81 | O16  | 2.00 |
| O5   | 1.66 | O17  | 0.80 |
| O6   | 1.84 | O18  | 1.85 |
| O7   | 1.98 | O19  | 1.18 |
| O8   | 2.02 | O20  | 1.66 |
| O9   | 1.85 | O21  | 1.89 |
| O10  | 1.80 | O22  | 1.85 |
| O11  | 1.70 | O23  | 1.80 |
| O12  | 1.61 | O24  | 1.74 |

**Table S3.** The BVS calculations of all crystallographically unique W, Se and Ru atoms on **1a**.

| Atom lable | BVS  | Atom lable | BVS  |
|------------|------|------------|------|
| W1         | 6.14 | W5         | 6.25 |
| W2         | 6.01 | W6         | 5.81 |
| W3         | 6.06 | Se1        | 3.84 |
| W4         | 6.46 | Ru1        | 4.07 |

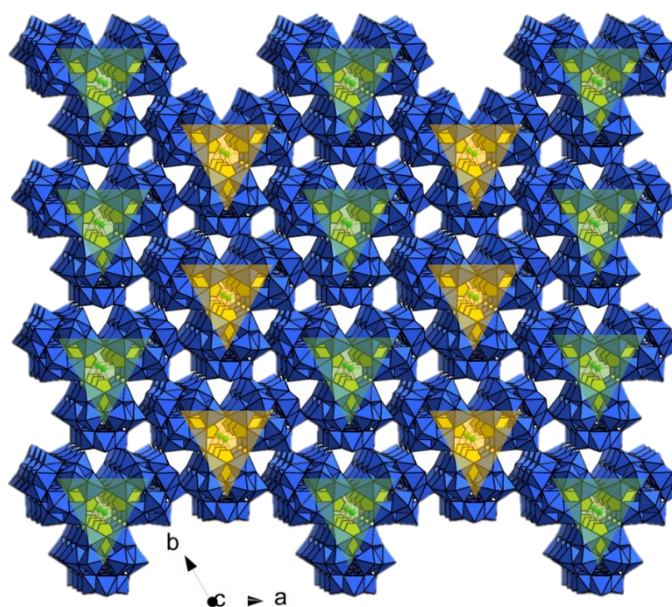

**Fig. S4** The crystal packing arrangements of polyanions **1a** packing along the c axes and the simplified packing of **1a** viewed along the ab plane.  $\text{Rb}^+$ ,  $\text{Cl}^-$  ions and lattice water molecules are neglected for the sake of clarity.

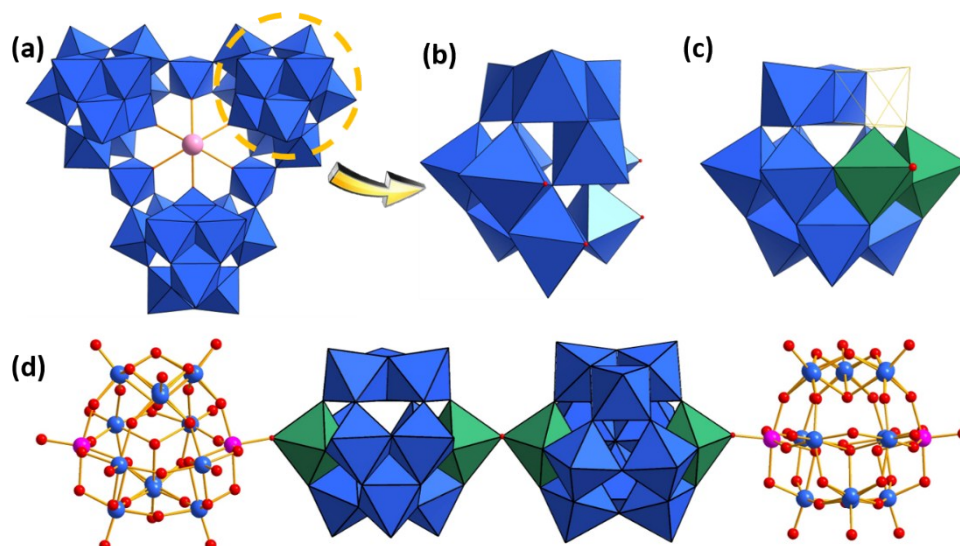

**Fig. S5** (a) ball-and-stick representation of polyanion  $\{(H_2O)_4K[H_{12}W_{36}O_{120}]\}^{11-}$  ( $\{W_{36}\}$ ); (b) the divacant  $\{W_{11}\}$  building block in  $\{W_{36}\}$  cluster; (c) the monovacant Keggin-like  $\{H_3Ru_{0.83}W_{10.17}O_{40}\}$  building block in polyanion **1a**; (d) a chain-linked iso-POT  $\{(DMAH)_6[H_4CoW_{11}O_{39}] \cdot 6H_2O\}_n$  based on monovacant Keggin-like  $\{W_{11}\}$  subunit. Colour code: W/CoO<sub>6</sub> octahedra, sea green; W spheres, light blue; K sphere, rose; unordered W/Co spheres, pink.

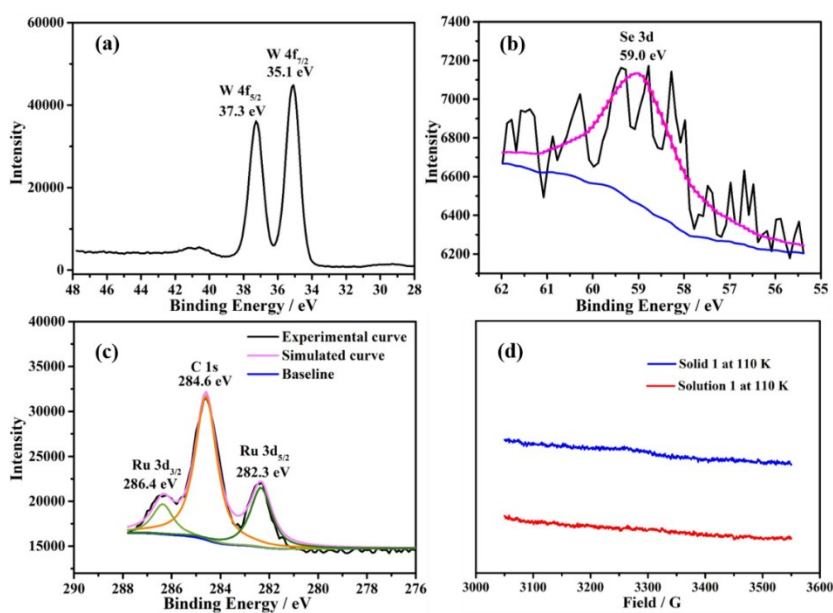

**Fig. S6** XPS spectra for (a) W 4f, (b) Se 3d, and (c) Ru 3d. Spectra analysis was carried out using peak fitting with Gaussian–Lorentzian peak shape and Shirley type background subtraction, and the C 1s peak typically locates at 284.6 eV taking as a reference. (d) Low-temperature EPR spectra of compound **1**.

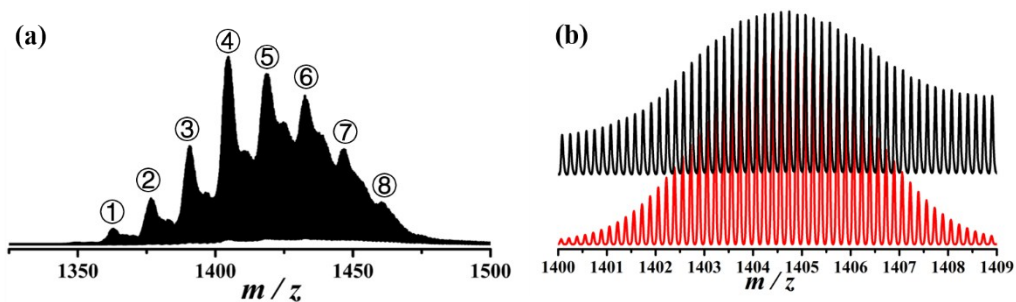

**Fig. S7** (a) Negative ESI-MS spectrum of compound **1** in the selected range  $m/z = 1325\text{--}1500$ , and the detailed assignments were listed in Table S5; (b) Selected experimental (black) and simulated (red) mass spectra of the isotopic envelopes for at  $m/z = 1404.74 (-6)$ . (Concentration, ca.  $5 \times 10^{-6}$  mol  $L^{-1}$ ; Solvent, aqueous solution; Flow rate,  $20 \mu L \text{ min}^{-1}$ )

**Table S4.** Detailed assignment of mass spectral data in the selected range  $m/z = 1325\text{--}1500$ .

| Peak numbers | Formula                                                       | $m/z$ (found) | $m/z$ (calcd.) |
|--------------|---------------------------------------------------------------|---------------|----------------|
| 1            | $\{H_{10}[SeO_3(H_9Ru_{5.5}W_{30.5}O_{114})](H_2O)_2\}^{6-}$  | 1362.9109     | 1362.9520      |
| 2            | $\{H_{10}[SeO_3(H_9Ru_{5.5}W_{30.5}O_{114})](H_2O)_7\}^{6-}$  | 1376.6036     | 1376.5293      |
| 3            | $\{RbH_9[SeO_3(H_9Ru_{5.5}W_{30.5}O_{114})](H_2O)_7\}^{6-}$   | 1390.5895     | 1390.6059      |
| 4            | $\{Rb_2H_8[SeO_3(H_9Ru_{5.5}W_{30.5}O_{114})](H_2O)_7\}^{6-}$ | 1404.7367     | 1404.6825      |
| 5            | $\{Rb_3H_7[SeO_3(H_3RuW_{11}O_{38})_3](H_2O)_7\}^{6-}$        | 1418.5607     | 1418.7592      |
| 6            | $\{Rb_4H_6[SeO_3(H_3RuW_{11}O_{38})_3](H_2O)_7\}^{6-}$        | 1432.7256     | 1432.8358      |
| 7            | $\{Rb_5H_5[SeO_3(H_3RuW_{11}O_{38})_3](H_2O)_7\}^{6-}$        | 1446.8631     | 1446.9124      |
| 8            | $\{Rb_6H_4[SeO_3(H_3RuW_{11}O_{38})_3](H_2O)_7\}^{6-}$        | 1460.8528     | 1460.9890      |

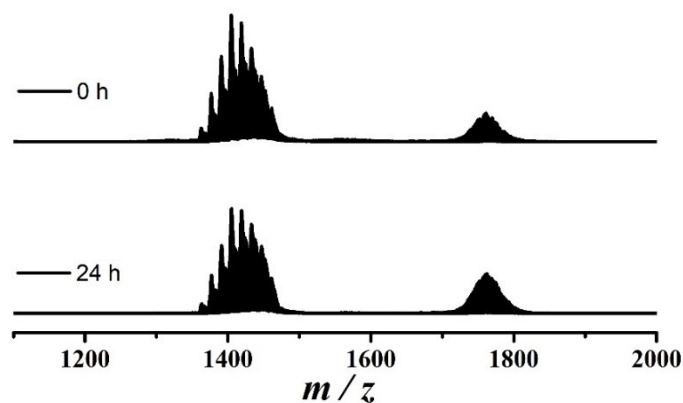

Fig. S8 Negative ESI-MS spectra of compound 1 in aqueous solution over 24 h.

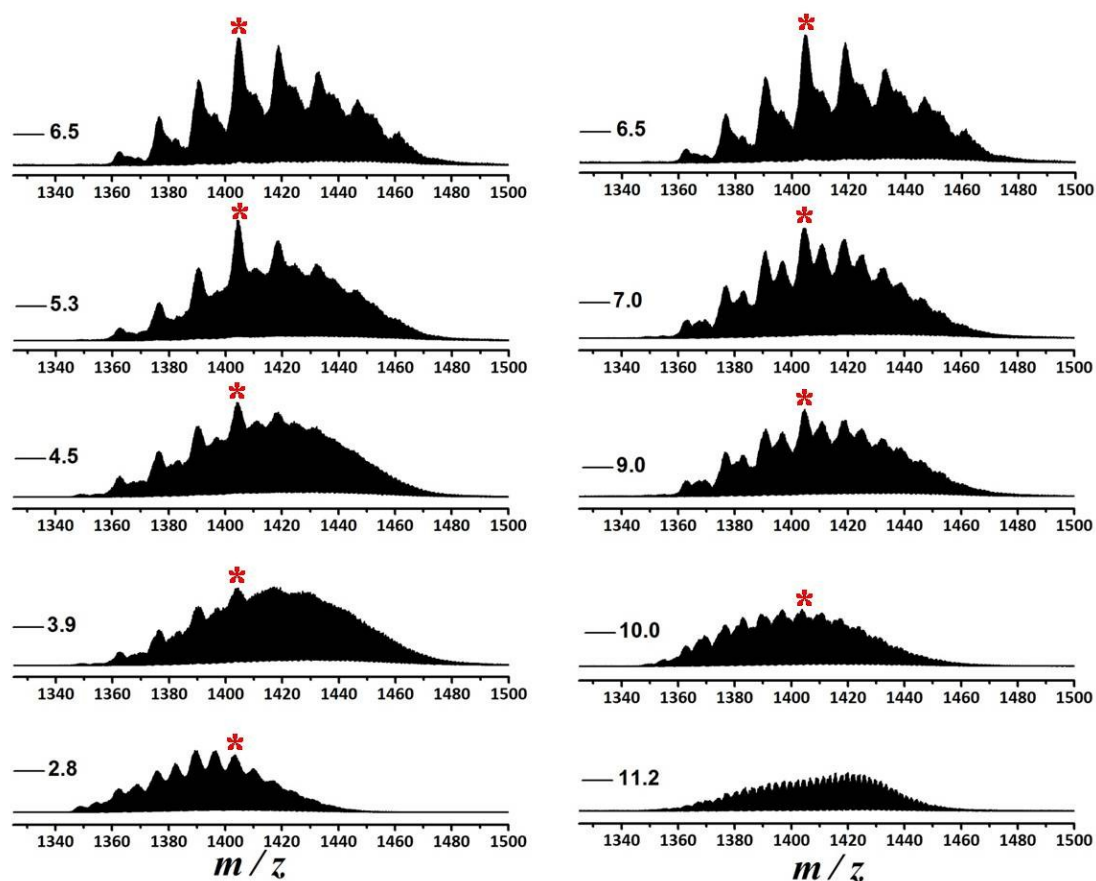

Fig. S9 Negative ESI-MS spectrum of compound 1 at different pH values in the selected range  $m/z = 1325-1500$ . Natural pH value reached 6.5 ( $\pm 0.1$ ) when compound 1 was dissolved into deionized water at about  $5 \times 10^{-6}$  mol  $L^{-1}$  concentration. Peaks with red asterisk (\*) were all around 1404.7(-6), assigned to the species of the intact polyanion  $\{Rb_2H_8[SeO_3(H_9Ru_{5.5}W_{30.5}O_{114})](H_2O)_7\}^{6-}$  (Concentration, ca.  $5 \times 10^{-6}$  mol  $L^{-1}$ ; Solvent, aqueous solution; Flow rate, 20  $\mu L \text{ min}^{-1}$ ).

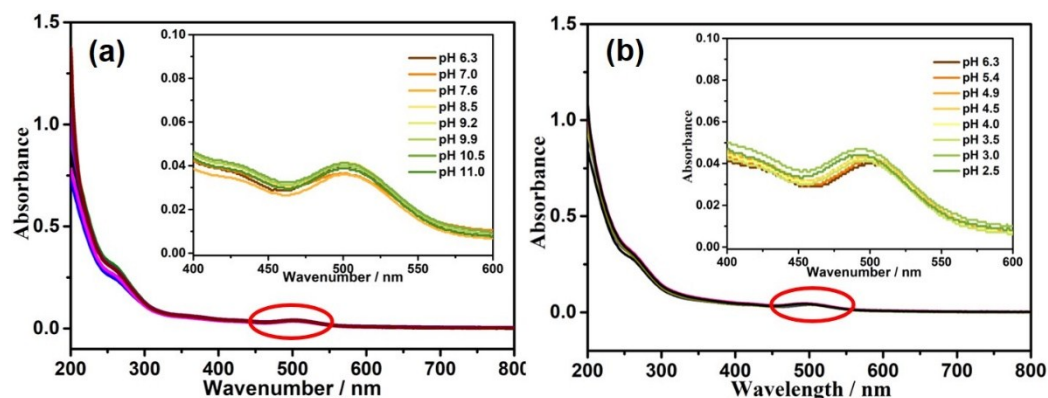

Fig. S10 UV/Vis spectra of **1** in dilute solution at different pH values: (a) pH = 6.3–11.0; (b) pH = 2.5–6.3.

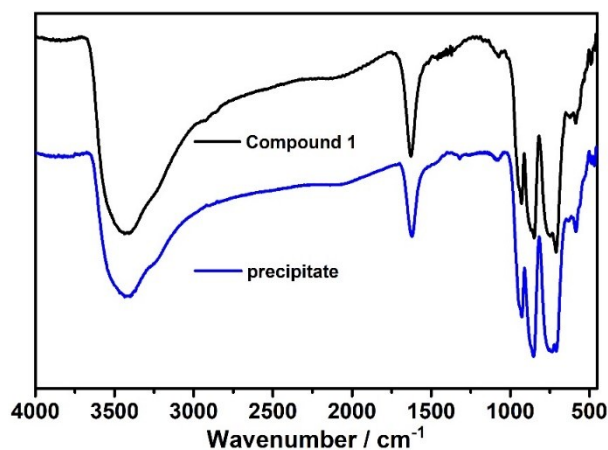

Fig. S11 IR spectra of compound **1** (black line) and before and precipitation obtained by addition of excess RbCl solids into 0.5 M NaCl solution (containing 1 mM **1**) after continuous cycling test 50 cycles (blue line).

## IR spectra

The building block  $\{H_3RuW_{11}O_{40}\}$  in compound **1** and metatungstate (namely saturated Keggin-like iso-POT  $\alpha$ - $\{H_2W_{12}O_{40}\}$ ) is proved to share the similar structure, which has been described in crystallographic description. To undergird this result, IR spectra were recorded from two freshly prepared samples of compound **1** and  $(n-Pr_4N)_4[H_4W_{12}O_{40}]$  obtained from Himeno,<sup>14</sup> both of which obviously exhibit three kinds of characteristic vibration derived from the Keggin-like framework in the wavenumber region of 1300–400  $cm^{-1}$  (Fig. S11). For compound **1**, the vibrations of terminal  $\nu(W-O_t)$  (pink region), edge-sharing  $\nu(W-O_b)$  (yellow region) and corner-sharing  $\nu(W-O_c)$  (blue region) vibrations can be figured out at 907  $cm^{-1}$ , 846–823  $cm^{-1}$  and 723–675  $cm^{-1}$ , respectively, while in the case of  $Na_6[H_2W_{12}O_{40}]$  they are located at 968  $cm^{-1}$ , 918–884  $cm^{-1}$  and 798  $cm^{-1}$ . Obviously, three characteristic vibrations of compound **1**, by contrast, all show slightly red shifts than those of  $Na_6[H_2W_{12}O_{40}]$ , which may be concerned for the substitution of Ru decreasing the vibrational frequency of W–O bonds.<sup>15</sup>



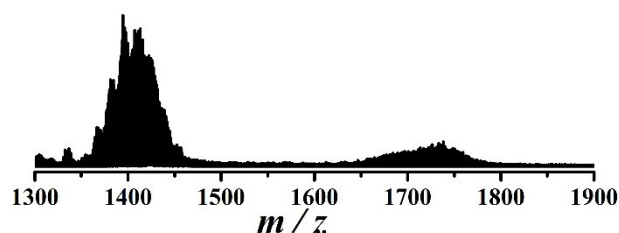

**Fig. S12** Negative ESI-MS spectra of the precipitate which obtained from treating electrolyte solution (containing the compound **1**). (Solvent, aqueous solution; Flow rate, 20  $\mu\text{L min}^{-1}$ ). The Highest Peak  $m/z = 1395.46(-6)$  can be assigned to the species of the intact polyanion  $\{\text{Rb}_2\text{H}_8[\text{SeO}_3(\text{H}_9\text{Ru}_{5.5}\text{W}_{30.5}\text{O}_{114})](\text{H}_2\text{O})_4\}^{6-}$  (calcd.  $m/z = 1395.67(-6)$ ).

**Table S5.** Electrocatalytic performance of nitrite oxidation for various catalysts or modified electrodes.

| Catalysts/electrodes                                 | electrolyte                   | Oxidation potential ( $E_0$ ) | Peak Current ( $I_0$ )/<br>concentration of $\text{NO}_2^-$ | Ref. |
|------------------------------------------------------|-------------------------------|-------------------------------|-------------------------------------------------------------|------|
| $\text{PMo}_{11}\text{V}/\text{PDDA-rGO}$            | 0.2 M PBS (pH 7.0)            | $\approx 0.84$ V              | $\approx 47 \mu\text{A} / 0.5$ mM                           | 16   |
| 3D-mp-rGO-POM-GCE                                    | 0.1 M $\text{H}_2\text{SO}_4$ | 0.6–0.8 V (vs. SCE)           | $\approx 25 \mu\text{A} / 1$ mM                             | 17   |
| Cu/MWCNTs-GC                                         | 0.1 M PBS (pH 7.0)            | 0.93 V (vs. SCE)              | $\approx 36 \mu\text{A} / 1$ mM                             | 18   |
| Dend/AuNps(II)/Pt                                    | 0.1 mM $\text{NaClO}_4$       | 0.80 V (vs. SCE)              | $\approx 19 \mu\text{A} / 1$ mM                             | 19   |
| Bare Pt                                              | 0.1 mM $\text{NaClO}_4$       | 0.88 V (vs. SCE)              | $\approx 13 \mu\text{A} / 1$ mM                             | 19   |
| CU/MWCNT/Gr/GCE                                      | 0.1 M PBS (pH 7.0)            | $\approx 0.93$ V (vs. SCE)    | $\approx 225 / 5$ mM                                        | 20   |
| GC/Ag-P(MMA-co-AMPS)                                 | 0.1 M PBS (pH 7.0)            | 0.80 V (vs. SCE)              | $\approx 33 \mu\text{A} / 1$ mM                             | 21   |
| [VO(SB)]-CPE                                         | 0.1 M PBS (pH 4.0)            | $\approx 0.85$ V (vs. SCE)    | $\approx 13 \mu\text{A} / 1$ mM                             | 22   |
| AuNPs-S-Gr/GCE                                       | 0.1 M PBS (pH 4.0)            | 0.88 V (vs. Ag/AgCl)          | $\approx 132 \mu\text{A} / 4$ mM                            | 23   |
| FeTMPyP/HTi <sub>2</sub> NbO <sub>7</sub><br>NSs/GCE | 0.2 M PBS (pH 7.0)            | 0.80 V (vs. SCE)              | $\approx 250 \mu\text{A} / 8$ mM                            | 24   |
| Au NRs-Nafon-GCE                                     | 0.1 M PBS (pH 6.0)            | $\approx 0.83$ V              | $\approx 19 \mu\text{A} / 0.5$ mM                           | 25   |
| CR-GO/GCE                                            | 0.1 M PBS (pH 5.0)            | 0.82 V (vs. SCE)              | $\approx 68 \mu\text{A} / 1$ mM                             | 26   |
| Catalyst <b>1</b> (bare GC)                          | 0.5 M NaCl                    | 0.83 V (vs. Ag/AgCl)          | $59 \mu\text{A} / 1$ mM                                     | here |

Note: "GCE" and "GC" appeared in the first column are both referred to glassy carbon electrode, carbon paste electrode was cited as CPE.



*Chem.*, 2018, **266**, 873–882.

- 19 J. Losada, M. P. G. Armada, E. García, C. M. Casado, B. Alonso, *J. Electroanal. Chem.*, 2017, **788**, 14–22.
- 20 A. Abo-Hamad, M. A. AlSaadi, M. A. Hashim, *J. Electroanal. Chem.*, 2018, **812**, 107–114.
- 21 P. K. Rastogi, V. Ganesan, S. Krishnamoorthi, *J. Mater. Chem. A*, 2014, **2**, 933–943.
- 22 M. A. Kamyabi, F. Aghajanloo, *J. Electroanal. Chem.*, 2008, **614**, 157–165.
- 23 S. A. Bhat, S. A. Pandit, M. A. Rather, G. M. Rather, N. Rashid, P. P. Ingole, M. A. Bhat, *New J. Chem.*, 2017, **41**, 8347–8358.
- 24 M. Wang, Z. Fan, L. Yi, J. Xu, X. Zhang, Z. Tong, *J. Mater. Sci.*, 2018, **53**, 11403–11414.
- 25 D. Rao, J. Zhang, J. Zheng, *J. Iran. Chem. Soc.*, 2016, **13**, 2257–2266.
- 26 V. Mani, A. P. Periasamy, S.-M. Chen, *Electrochem. Commun.*, 2012, **17**, 75–78.
- 27 Y. Huo, Y.-C. Chen, S.-G. Wu, J.-H. Jia, W.-B. Chen, J.-L. Liu, M.-L. Tong, *Inorg. Chem.*, 2018, **57**, 6773–6777.
- 28 J. A. F. Gamelas, H. M. Carapuça, M. S. Balula, D. V. Evtuguin, W. Schlindwein, F. G. Figueiras, V. S. Amaral, A. M. V. Cavaleiro, *Polyhedron*, 2010, **29**, 3066–3073.
- 29 Z.-G. Lin, B. Wang, J. Cao, B.-K. Chen, Y.-Z. Gao, Y.-N. Chi, C. Xu, X.-Q. Huang, R.-D. Han, S.-Y. Su, C.-W. Hu, *Inorg. Chem.*, 2012, **51**, 4435–4437.
